# Supplementary material
Source: MDPI journal article supplement (https://www.mdpi.com/2075-4434/5/4/58)
Supplement: s1 [file s1]

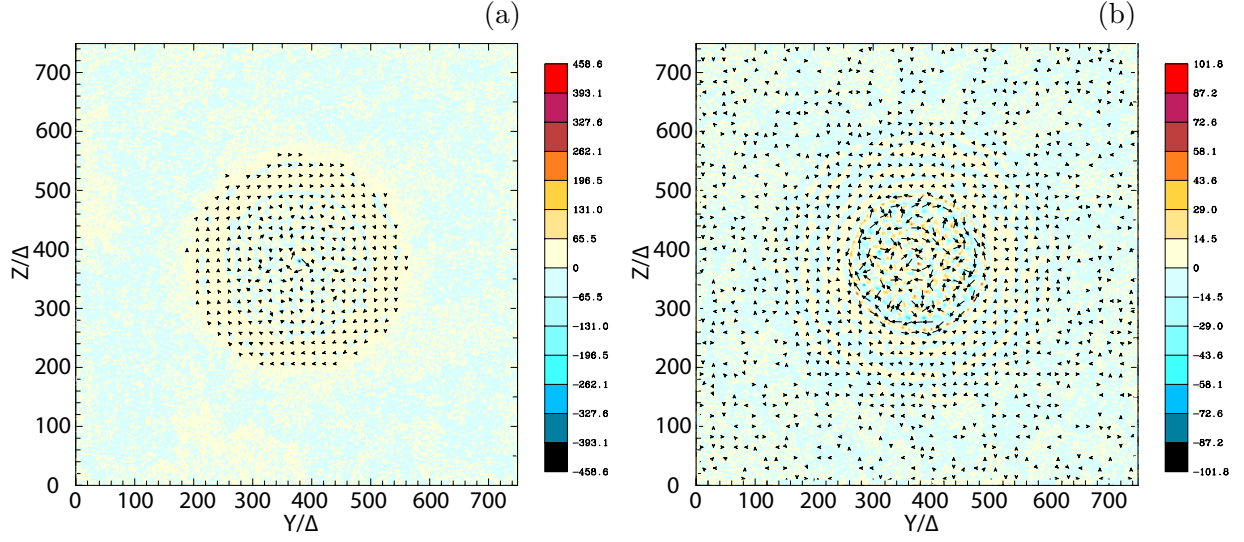

Fig. 1.— Panels show iso-surface plots of the  $x$  component of current  $J_x$  in the  $y-z$  plane for  $e^- - p^+$  (a) and  $e^\pm$  (b) jet with  $r_{\text{jet}} = 120\Delta$  at  $x = 380\Delta$  at time  $t = 500\omega_{\text{pe}}^{-1}$ . For the  $e^\pm$  (b) jet the patterns of rings are generated outside of the jet by the kKHI. The arrows show the magnetic field strength in the  $y-z$  plane.
